# Supplementary material
Source: PubMed Central journal article supplement (PMC4542076)
Supplement: NIHMS273048-supplement-Supp1.pdf [file NIHMS273048-supplement-Supp1.pdf]

## Supplemental Material

Appendix. Comparison of Patient Characteristics Between Patients With and Without Data on Body Mass Index.

| PATIENT CHARACTERISTICS                | Included Patients<br>(n=21,237) | Excluded Patients<br>(n=13,351) |
|----------------------------------------|---------------------------------|---------------------------------|
| <b>ARREST RHYTHM</b>                   |                                 |                                 |
| Asystole                               | 36.3%                           | 35.9%                           |
| Pulseless Electrical Activity          | 42.6%                           | 43.8%                           |
| Ventricular fibrillation               | 12.6%                           | 12.1%                           |
| Pulseless Ventricular Tachycardia      | 8.6%                            | 8.2%                            |
| Age, years $\pm$ SD                    | 66.0 $\pm$ 15.6                 | 65.8 $\pm$ 16.3                 |
| Male sex                               | 58.4%                           | 57.8%                           |
| Nonwhite Race                          | 35.5%                           | 36.6%                           |
| <b>HOSPITAL ARREST LOCATION</b>        |                                 |                                 |
| Intensive care unit                    | 50.3%                           | 45.8%                           |
| Telemetry unit                         | 16.9%                           | 15.2%                           |
| Nonmonitored unit                      | 18.7%                           | 18.4%                           |
| Procedure Suites                       | 6.5%                            | 6.9%                            |
| Emergency Room                         | 6.3%                            | 10.5%                           |
| Other                                  | 1.3%                            | 1.2%                            |
| <b>ARREST CHARACTERISTICS</b>          |                                 |                                 |
| Hospital-wide code blue                | 80.1%                           | 78.7%                           |
| Time of day or week for cardiac arrest |                                 |                                 |
| <i>Weeknight (5pm to 8am)</i>          | 61.4%                           | 62.3%                           |
| <i>Weekend</i>                         | 26.7%                           | 27.4%                           |
| <i>Afterhours (Nights or Weekends)</i> | 71.5%                           | 72.5%                           |
| Cardiac Admitting Diagnosis            | 40.1%                           | 39.6%                           |
| <b>PRE-ARREST CHARACTERISTICS</b>      |                                 |                                 |
| CHF during admission                   | 17.7%                           | 16.8%                           |
| Prior CHF before admission             | 18.5%                           | 17.6%                           |
| MI during admission                    | 16.1%                           | 15.4%                           |
| Prior MI before admission              | 14.8%                           | 13.2%                           |
| Hypotension                            | 26.3%                           | 24.4%                           |
| Metastatic or Hematologic Malignancy   | 11.9%                           | 11.6%                           |
| Respiratory insufficiency              | 39.1%                           | 37.7%                           |
| Renal insufficiency                    | 31.5%                           | 28.8%                           |
| Renal failure requiring hemodialysis   | 4.0%                            | 3.6%                            |
| Hepatic insufficiency                  | 7.0%                            | 6.2%                            |
| Diabetes mellitus                      | 28.8%                           | 26.2%                           |
| Baseline CNS depression                | 12.4%                           | 11.3%                           |
| Acute stroke                           | 3.8%                            | 3.4%                            |
| Pneumonia                              | 12.7%                           | 10.8%                           |
| Sepsis                                 | 16.3%                           | 17.4%                           |
| Major trauma                           | 3.2%                            | 4.3%                            |
| <b>INTERVENTIONS AT TIME OF ARREST</b> |                                 |                                 |
| Mechanical ventilation                 | 33.2%                           | 34.8%                           |
| Intra-aortic balloon pump              | 1.7%                            | 1.2%                            |
| Pulmonary artery catheter              | 3.7%                            | 3.0%                            |
| Intravenous Dopamine                   | 12.3%                           | 12.7%                           |
| Intravenous Dobutamine                 | 3.6%                            | 3.1%                            |
| Intravenous Norepinephrine             | 13.5%                           | 12.6%                           |
| Intravenous Phenylephrine              | 5.2%                            | 4.9%                            |
